# Supplementary material
Source: PubMed Central journal article supplement (PMC3243543)
Supplement: supp_M111.292755_jbc.M111.292755-1.pdf [file supp_M111.292755_jbc.M111.292755-1.pdf]

Figure S1

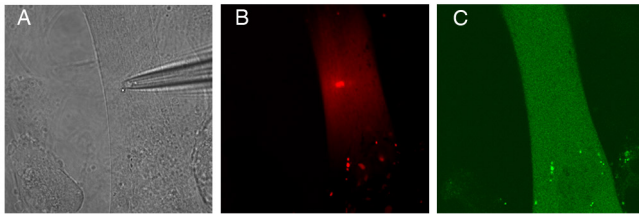

**Figure S1. Rhod-2  $\text{Ca}^{2+}$  measurements in myotubes.** (x,y) images showing a pJPA-positive (green fluorescence) myotube whole-cell-clamped with a patch pipette containing the calcium-sensitive-dye rhod-2 (red fluorescence image). Image side size: 102  $\mu\text{m}$

Figure S2

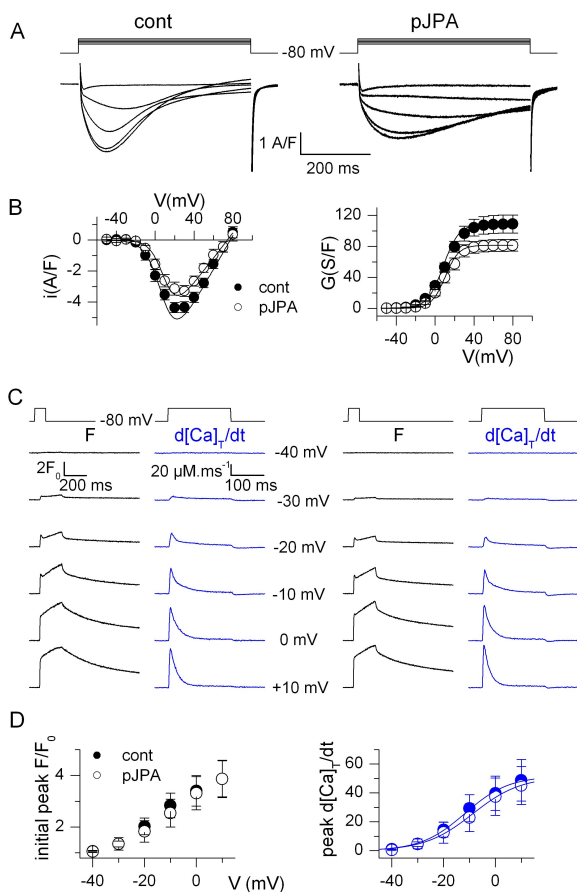

**Figure S2. Voltage dependence of DHPR-mediated  $\text{Ca}^{2+}$  entry and  $\text{Ca}^{2+}$  release in control and JPs knockdown-positive adult muscle fibers.** *A*,  $\text{Ca}^{2+}$  current traces obtained in a control (left) and in a pJPA-positive (right) muscle fiber in response to the depolarizing pulse protocol shown above; the current was measured in response to pulses from -80 mV to values ranging between -10 and +30 mV with a 10 mV increment. *B*, mean voltage dependence of the peak  $\text{Ca}^{2+}$  current density (left) and corresponding mean maximum conductance (right) in control (n=13) and pJPA-positive (n=14) muscle fibers. Superimposed lines were calculated from the average values of the parameters obtained from fitting the appropriate function to the individual series of data (see Methods). There was a slight

reduction of the L-type  $\text{Ca}^{2+}$  current density, corresponding to an ~25 % reduction of the peak conductance. Fitting the voltage dependence of the peak current in each cell gave mean values for  $G_{\text{max}}$ ,  $V_{\text{rev}}$ ,  $V_{0.5}$  and  $k$  of  $109 \pm 11$  S/F,  $77.3 \pm 3.7$  mV,  $8.3 \pm 2.7$  mV and  $8.1 \pm 0.6$  mV in control fibers and of  $81.5 \pm 8$  S/F,  $74.3 \pm 5.6$  mV,  $10.3 \pm 2.4$  mV and  $7.0 \pm 0.5$  mV in pSuperJPAi-GFP-positive fibers, respectively. The mean maximum conductance value was significantly depressed in the pSuperJPAi-GFP-positive cells ( $P=0.04$ ). *C*, rhod-2 fluorescence transients and corresponding  $\text{Ca}^{2+}$  release flux (blue traces, shown on an expanded time scale) from a control (left) and from a pJPA-positive (right) muscle fiber in response to depolarizing steps to the indicated levels. Rhod-2 signals were from spatially averaged confocal line-scan images. The  $\text{Ca}^{2+}$  release flux was estimated using a model of intracellular distribution that included EGTA as a major contributor to  $\text{Ca}^{2+}$  buffering (see SI Methods). There was no obvious qualitative difference between the control and the pSuperJPAi-GFP-positive fiber. *D*, voltage dependence of the mean initial peak amplitude of the rhod-2 transient (left) and of the peak  $\text{Ca}^{2+}$  release flux (right). A Boltzmann function was fitted to the two series of mean values of peak  $\text{Ca}^{2+}$  release, the result of which is shown as superimposed curves. The two sets of values did not differ.
